# Supplementary material
Source: PubMed Central journal article supplement (PMC4715266)
Supplement: NIHMS741058-supplement-6.pdf [file NIHMS741058-supplement-6.pdf]

## Supplemental Experimental Procedures

### *Preparation of single-stranded sequencing libraries*

Adapter 2 was prepared by combining 4.5 ul TE (pH 8), 0.5 ul 1M NaCl, 10 uL 500 uM oligo Adapter2.1, and 10 ul 500 uM oligo Adapter2.2, incubating at 95°C for 10 seconds, and ramping to 14°C at a rate of 0.1°C/s. Purified cfDNA fragments were dephosphorylated by combining 2X CircLigase II buffer (Epicentre), 5 mM MnCl<sub>2</sub>, and 1U FastAP (Thermo Fisher) with 0.5-10 ng fragments in 20 ul reaction volume and incubating at 37°C for 30 minutes. Fragments were then denatured by heating to 95°C for 3 minutes, and were immediately transferred to an ice bath. The reaction was supplemented with biotin-conjugated adapter oligo CL78 (5 pmol), 20% PEG-6000 (w/v), and 200U CircLigase II (Epicentre) for a total volume of 40 ul, and was incubated overnight with rotation at 60°C, heated to 95°C for 3 minutes, and placed in an ice bath. For each sample, 20 ul MyOne C1 beads (Life Technologies) were twice washed in bead binding buffer (BBB) (10 mM Tris-HCl [pH 8], 1M NaCl, 1 mM EDTA [pH 8], 0.05% Tween-20, and 0.5% SDS), and resuspended in 250 ul BBB. Adapter-ligated fragments were bound to the beads by rotating for 60 minutes at room temperature. Beads were collected on a magnetic rack and the supernatant was discarded. Beads were washed once with 500 ul wash buffer A (WBA) (10 mM Tris-HCl [pH 8], 1 mM EDTA [pH 8], 0.05% Tween-20, 100 mM NaCl, 0.5% SDS) and once with 500 ul wash buffer B (WBB) (10 mM Tris-HCl [pH 8], 1 mM EDTA [pH 8], 0.05% Tween-20, 100 mM NaCl). Beads were combined with 1X Isothermal Amplification Buffer (NEB), 2.5 uM oligo CL9, 250 uM (each) dNTPs, and 24U Bst 2.0 DNA Polymerase (NEB) in a reaction volume of 50 ul, incubated with gentle shaking by ramping temperature from 15°C to 37°C at 1°C/minute, and held at 37°C for 10 minutes. After collection on a magnetic rack, beads were washed once with 200 ul WBA, resuspended in 200 ul of stringency wash buffer (SWB) (0.1X SSC, 0.1% SDS), and incubated at 45°C for 3 minutes. Beads were again collected and washed once with 200 ul WBB. Beads were then combined with 1X CutSmart Buffer (NEB), 0.025% Tween-20, 100 uM (each) dNTPs, and 5U T4 DNA Polymerase (NEB) and incubated with gentle shaking for 30 minutes at room temperature. Beads were washed once with each of WBA, SWB, and WBB as described above. Beads were then mixed with 1X CutSmart Buffer (NEB), 5% PEG-6000, 0.025% Tween-20, 2 uM double-stranded Adapter 2, and 10U T4 DNA Ligase (NEB), and incubated with gentle shaking for 2 hours at room temperature. Beads were washed once with each of WBA, SWB, and WBB as described above, and resuspended in 25 ul TET buffer (10 mM Tris-HCl [pH 8], 1 mM EDTA [pH 8], 0.05% Tween-20). Second strands were eluted from beads by heating to 95°C, collecting beads on a magnetic rack, and transferring the supernatant to a new tube. Library amplification was monitored by real-time PCR, requiring an average of 4-6 cycles per library.

### *Simulated reads and nucleotide frequencies*

Aligned sequencing data was simulated (SR if shorter than 45 bp, PE 45 bp otherwise) for all major chromosomes of the human reference (GRC37h). Dinucleotide frequencies were determined from real data on both fragment ends and both strand orientations, and for the reference genome on both strands. The insert size distribution of the real data was extracted for the 1-500 bp range. Reads were simulated procedurally: at each step (i.e., at least once at each genomic coordinate, depending on desired coverage), (1) the strand is randomly chosen, (2) the ratio of the dinucleotide frequency in the real data to that in the reference sequence is used to randomly decide whether the initiating dinucleotide is considered, (3) an length is sampled from the insert size distribution, and (4) the frequency ratio of the terminal dinucleotide is used to randomly decide whether the generated alignment is reported. The simulated coverage was matched to that of the original data after PCR duplicate removal.

### *Analysis of nucleotide composition of 167 bp fragments*

Fragments with inferred lengths of exactly 167 bp were filtered within samples to remove duplicates. Dinucleotide frequencies were calculated in a strand-aware manner, using a sliding 2 bp window and reference alleles at each position, beginning 50 bp upstream of one fragment endpoint and ending 50 bp downstream of the other endpoint. Observed dinucleotide frequencies at each position were compared to expected dinucleotide frequencies determined from a set of simulated reads reflecting the same cleavage biases calculated in a library-specific manner.

#### Analysis of TFBSs and genomic features

We started with clustered FIMO (motif-based) intervals (Grant et al., 2011; Maurano et al., 2012) defining a set of computationally predicted TFBSs. For a subset of clustered TFs (AP-2-2, AP-2, CTCF\_Core-2, E2F-2, EBF1, Ebox-CACCTG, Ebox, ESR1, ETS, MAFK, MEF2A-2, MEF2A, MYC-MAX, PAX5-2, RUNX2, RUNX-AML, STAF-2, TCF-LEF, YY1), we retained only predicted TFBSs that overlap with ENCODE ChIP-seq peaks (TfbsClusteredV3 set downloaded from <http://hgdownload.cse.ucsc.edu/goldenPath/hg19/encodeDCC/wgEncodeRegTfbsClustered/>).

WPS values for CH01 and the corresponding simulation were extracted for each position in a 5 kb window around the start coordinate of each TFBS, and was aggregated within each TF cluster. The mean WPS of the first and last 500 bp (which is predominantly flat and represents a mean offset) of the 5 kb window was subtracted from the original WPS at each position. For L-WPS only, a sliding window mean is calculated using a 200 bp window and subtracted from the original signal. Finally, the corrected WPS profile for the simulation is subtracted from the corrected WPS profile for CH01 to correct for signal that is a product of fragment length and ligation bias. This final profile is plotted and termed the Adjusted WPS. In figures, CTCF binding sites are shifted such that the zero coordinate on the x-axis is the center of its 52 bp binding footprint (Ong and Corces, 2014). Genomic coordinates of transcription start sites, transcription end sites, start codons, and splice donor and acceptor sites were obtained from Ensembl Build version 75. Adjusted WPS surrounding these features was calculated as for TFBSs.

#### Analysis of CTCF sites

CTCF sites first included clustered FIMO binding site predictions (described above). This set was intersected with ENCODE ChIP-seq peaks (TfbsClusteredV3, described above), and then further intersected with a set of CTCF binding sites experimentally observed to be active across 19 tissues (Wang et al., 2012), to produce three increasingly stringent sets. For each CTCF site, distances between each of 20 flanking nucleosomes (10 upstream and 10 downstream) were calculated. The mean S-WPS and L-WPS at each position relative to the center of the CTCF binding motif were also calculated within bins defined by spacing between -1 and +1 nucleosomes (>160 bp, 161-200 bp, 201-230 bp, 231-270 bp, 271-420 bp, 421-460 bp, and >460 bp).

#### Analysis of DHS sites

DHS peaks for 349 primary tissue and cell line samples were downloaded from [http://www.uwencode.org/proj/Science\\_Maurano\\_Humbert\\_et\\_al/data/all\\_fdr0.05\\_hot.tgz](http://www.uwencode.org/proj/Science_Maurano_Humbert_et_al/data/all_fdr0.05_hot.tgz). Samples derived from fetal tissues (233 of 349) were removed from the analysis as they behaved inconsistently within tissue type, possibly because of unequal representation of cell types within each tissue sample. 116 DHS callsets from a variety of cell lineages were retained for analysis. For the midpoint of each DHS peak in a particular set, the nearest upstream and downstream calls in the CH01 callset were identified, and the distance between the centers of those two calls was calculated. The distribution of all such distances was visualized for each DHS peak callset using a smoothed density estimate calculated for distances between 0 and 500 bp.

#### Fourier transformation and smoothing of trajectories

We use parameters to smooth (3 bp Daniell smoother, moving average giving half weight to the end values) and de-trend the data (i.e. subtract the mean of the series and remove a linear trend). A recursive time series filter implemented in R was used to remove high frequency variation from trajectories. 24 filter frequencies ( $1/\text{seq}(5,100,4)$ ) were used, and the first 24 values of the trajectory were taken as init values. The 24-value shift in the resulting trajectories was corrected by repeating the last 24 values of the trajectory.

## Supplemental Tables

| Sample name | Library type | Reads          | Fragments sequenced | Aligned | Aligned Q30 | Coverage | Est. % duplicates | 35-80bp | 120-180bp |
|-------------|--------------|----------------|---------------------|---------|-------------|----------|-------------------|---------|-----------|
| BH01        | DSP          | 2x101          | 1489569204          | 97.20%  | 88.85%      | 96.32    | 6.00%             | 0.65%   | 57.64%    |
| IH01        | DSP          | 2x101          | 1572050374          | 98.58%  | 90.60%      | 104.92   | 21.00%            | 0.77%   | 47.83%    |
| IH02        | SSP          | 2x50,<br>43/42 | 779794090           | 93.19%  | 75.27%      | 30.08    | 20.05%            | 21.83%  | 44.00%    |
| CH01        | --           | --             | 3841413668          | 96.95%  | 86.81%      | 231.32   | 14.99%            | 5.00%   | 50.85%    |

**Table S1: Sequencing statistics for samples BH01, IH01, IH02, and CH01, related to Experimental Procedures.** For each sample, sequencing-related statistics, including the total number of fragments sequenced, read lengths, the percentage of such fragments aligning to the reference with and without a mapping quality threshold, mean coverage, duplication rate, and the proportion of sequenced fragments in two length bins, are tabulated. Fragment length is inferred from alignment of paired-end reads. Due to the short read lengths, coverage is calculated by assuming the entire fragment had been read. The estimated number of duplicate fragments is based on fragment endpoints, which may overestimate the true duplication rate in the presence of highly stereotyped cleavage. SSP, single-stranded library preparation protocol. DSP, double-stranded library preparation protocol.

| Oligo Name | Sequence (5'-3')                                                                           | Notes                  |
|------------|--------------------------------------------------------------------------------------------|------------------------|
| CL9        | GTGACTGGAGTTCAGACGTGTGCTCTTCCGATCT                                                         | HPLC purification      |
| Adapter2.1 | CGACGCTCTTCCGATC/ddT/                                                                      | HPLC purification      |
| Adapter2.2 | /5Phos/AGATCGGAAGAGCGTCGTGTAGGGAAAGAG*T*G*T*A                                              | HPLC purification      |
| CL78       | /5Phos/AGATCGGAAG/iSpC3/iSpC3/iSpC3/iSpC3/iSpC3/iSpC3/<br>iSpC3/iSpC3/iSpC3/iSpC3/3BioTEG/ | Dual HPLC purification |

**Table S2: Synthetic oligos used in preparation of single stranded sequencing libraries, related to Experimental Procedures.** Sequences adapted from Gansauge et al., 2013. \*, phosphorothioate bond. /5Phos/, 5' phosphorylation. /ddT/, dideoxythymidine. /iSpC3/, C3 spacer. /3BioTEG/, 3' biotin-TEG.

| Sample ID | Clinical Dx                                   | Stage | cfDNA Yield (ng/ml) | Patient Sex |
|-----------|-----------------------------------------------|-------|---------------------|-------------|
| IC01 †    | Kidney cancer (Transitional cell)             | IV    | 242                 | F           |
| IC02      | Ovarian cancer (undefined)                    | IV    | 22.5                | F           |
| IC03      | Skin cancer (Melanoma)                        | IV    | 12.0                | M           |
| IC04      | Breast cancer (Invasive/infiltrating ductal)  | IV    | 12.6                | F           |
| IC05      | Lung cancer (Adenocarcinoma)                  | IV    | 5.4                 | M           |
| IC06      | Lung cancer (Mesothelioma)                    | IV    | 11.4                | M           |
| IC07 †    | Gastric cancer (undefined)                    | IV    | 52.2                | M           |
| IC08      | Uterine cancer (undefined)                    | IV    | 15.0                | F           |
| IC09      | Ovarian cancer (serous tumors)                | IV    | 8.4                 | F           |
| IC10      | Lung cancer (adenocarcinoma)                  | IV    | 11.4                | F           |
| IC11      | Colorectal cancer (undefined)                 | IV    | 11.4                | M           |
| IC12      | Breast cancer (Invasive/infiltrating lobular) | IV    | 12.0                | F           |
| IC13      | Prostate cancer (undefined)                   | IV    | 12.3                | M           |
| IC14      | Head and neck cancer (undefined)              | IV    | 27.0                | M           |
| IC15 §    | Lung cancer (Small cell)                      | IV    | 22.5                | M           |
| IC16      | Bladder cancer (undefined)                    | IV    | 14.1                | M           |
| IC17 §    | Liver cancer (Hepatocellular carcinoma)       | IV    | 39.0                | M           |
| IC18      | Kidney cancer (Clear cell)                    | IV    | 10.5                | F           |
| IC19      | Testicular cancer (Seminomatous)              | IV    | 9.6                 | M           |
| IC20 §    | Lung cancer (Squamous cell carcinoma)         | IV    | 21.9                | M           |
| IC21      | Pancreatic cancer (Ductal adenocarcinoma)     | IV    | 35.4                | M           |
| IC22      | Lung cancer (Adenocarcinoma)                  | IV    | 11.4                | F           |
| IC23      | Liver cancer (Hepatocellular carcinoma)       | IV    | 17.1                | M           |
| IC24      | Pancreatic cancer (Ductal adenocarcinoma)     | IV    | 37.2                | M           |
| IC25      | Pancreatic cancer (Ductal adenocarcinoma)     | IV    | 27.9                | M           |
| IC26      | Prostate cancer (Adenocarcinoma)              | IV    | 24.6                | M           |
| IC27      | Uterine cancer (undefined)                    | IV    | 19.2                | F           |
| IC28      | Lung cancer (Squamous cell)                   | IV    | 33.3                | M           |

| carcinoma) |                                                  |    |       |   |
|------------|--------------------------------------------------|----|-------|---|
| IC29       | Head and neck cancer (undefined)                 | IV | 14.4  | M |
| IC30       | Esophageal cancer (undefined)                    | IV | 10.5  | M |
| IC31 †     | Ovarian cancer (undefined)                       | IV | 334.8 | F |
| IC32       | Lung cancer (Small cell)                         | IV | 9.6   | F |
| IC33       | Colorectal cancer (Adenocarcinoma)               | IV | 13.8  | M |
| IC34       | Breast cancer (Invasive/infiltrating lobular)    | IV | 33.6  | F |
| IC35 §     | Breast cancer (Ductal carcinoma <i>in situ</i> ) | IV | 16.2  | F |
| IC36       | Liver cancer (undefined)                         | IV | 26.4  | M |
| IC37 §     | Colorectal cancer (Adenocarcinoma)               | IV | 15.9  | F |
| IC38       | Bladder cancer (undefined)                       | IV | 6.6   | M |
| IC39       | Kidney cancer (undefined)                        | IV | 39.0  | M |
| IC40       | Prostate cancer (Adenocarcinoma)                 | IV | 13.8  | M |
| IC41       | Testicular cancer (Seminomatous)                 | IV | 16.5  | M |
| IC42       | Lung cancer (Adenocarcinoma)                     | IV | 11.4  | F |
| IC43       | Skin cancer (Melanoma)                           | IV | 21.9  | F |
| IC44       | Esophageal cancer (undefined)                    | IV | 25.8  | F |
| IC45 †     | Colorectal cancer (Adenocarcinoma)               | IV | 3.0   | M |
| IC46 **    | Breast cancer (Ductal carcinoma <i>in situ</i> ) | IV | 36.6  | F |
| IC47       | Pancreatic cancer (Ductal adenocarcinoma)        | IV | 19.2  | F |
| IC48 **    | Breast cancer (Invasive/infiltrating lobular)    | IV | 13.8  | F |

**Table S4: Clinical diagnoses and cfDNA yield for cancer panel samples, related to Figure 5.** Shown are the clinical and histological diagnoses for 48 patients from whom plasma-borne cfDNA was screened for evidence of high tumor burden, along with total cfDNA yield from 1.0 ml of plasma from each individual and relevant clinical covariates. Of these 48, 44 passed QC and had sufficient material. Of these 44, five were selected for deeper sequencing. cfDNA yield was determined by Qubit Fluorometer 2.0 (Life Technologies).

§: sample was selected for additional sequencing.

\*\* : only 0.5 ml of plasma was available for this sample.

†: sample failed QC and was not used for further analysis.

| Sample name | Library type | Reads           | Fragments sequenced | Aligned | Aligned Q30 | Coverage | Est. % duplicates | 35-80bp | 120-180bp |
|-------------|--------------|-----------------|---------------------|---------|-------------|----------|-------------------|---------|-----------|
| IH03        | SSP          | 2x39            | 53292855            | 92.66%  | 72.37%      | 2.29     | 15.46%            | 11.05%  | 52.34%    |
| IP01 †      | DSP          | 2x101,<br>2x102 | 1214536629          | 97.22%  | 86.38%      | 76.11    | 0.55%             | 0.08%   | 62.77%    |
| IP02 †      | DSP          | 2x101,<br>2x102 | 855040273           | 97.16%  | 87.72%      | 52.46    | 0.83%             | 0.07%   | 68.10%    |
| IA01        | SSP          | 2x39            | 53934607            | 87.42%  | 68.30%      | 2.02     | 22.70%            | 15.20%  | 49.77%    |
| IA02        | SSP          | 2x39            | 42496222            | 95.42%  | 76.61%      | 1.95     | 4.74%             | 12.28%  | 59.00%    |
| IA03        | SSP          | 2x39            | 51278489            | 93.12%  | 71.33%      | 2.05     | 25.68%            | 14.27%  | 52.57%    |
| IA04        | SSP          | 2x39            | 50768476            | 90.30%  | 70.51%      | 2.14     | 7.83%             | 17.80%  | 36.76%    |
| IA05        | DSP          | 2x101           | 194985271           | 98.80%  | 90.61%      | 11.09    | 12.05%            | 2.24%   | 71.67%    |
| IA06        | DSP          | 2x101           | 171670054           | 98.90%  | 90.88%      | 9.90     | 5.41%             | 1.93%   | 71.26%    |
| IA07        | DSP          | 2x101           | 208609489           | 98.67%  | 90.34%      | 11.69    | 11.45%            | 2.59%   | 74.84%    |
| IA08        | DSP          | 2x101           | 193729556           | 98.81%  | 90.70%      | 10.84    | 11.96%            | 2.58%   | 76.24%    |
| IC02        | SSP          | 2x39            | 57913605            | 95.07%  | 75.57%      | 2.59     | 5.40%             | 12.98%  | 60.00%    |
| IC03        | SSP          | 2x39            | 63862631            | 95.78%  | 75.66%      | 2.79     | 8.32%             | 13.25%  | 62.20%    |
| IC04        | SSP          | 2x39            | 55239248            | 95.47%  | 76.26%      | 2.57     | 8.28%             | 10.98%  | 58.48%    |
| IC05        | SSP          | 2x39            | 39623850            | 89.80%  | 69.92%      | 1.60     | 9.24%             | 14.63%  | 50.33%    |
| IC06        | SSP          | 2x39            | 59679981            | 95.57%  | 74.90%      | 2.11     | 3.93%             | 24.30%  | 41.46%    |
| IC08        | SSP          | 2x39            | 46933688            | 94.38%  | 74.21%      | 1.92     | 5.92%             | 16.04%  | 45.25%    |
| IC09        | SSP          | 2x42            | 59639583            | 91.22%  | 71.15%      | 2.13     | 6.69%             | 21.39%  | 43.50%    |
| IC10        | SSP          | 2x42            | 53994406            | 93.73%  | 73.40%      | 1.83     | 2.00%             | 27.08%  | 37.62%    |
| IC11        | SSP          | 2x42            | 59225460            | 93.25%  | 72.51%      | 2.15     | 5.26%             | 21.30%  | 43.33%    |
| IC12        | SSP          | 2x42            | 57884742            | 93.52%  | 74.33%      | 2.34     | 2.66%             | 18.28%  | 46.58%    |
| IC13        | SSP          | 2x42            | 71946779            | 92.94%  | 72.47%      | 2.52     | 2.18%             | 23.51%  | 43.97%    |
| IC14        | SSP          | 2x42            | 61649203            | 94.54%  | 73.47%      | 2.20     | 3.23%             | 22.26%  | 43.37%    |
| IC15        | SSP          | 2x50,<br>43/42  | 908512803           | 95.49%  | 76.83%      | 29.77    | 10.66%            | 25.42%  | 38.47%    |
| IC16        | SSP          | 2x42            | 62739733            | 92.81%  | 72.85%      | 2.47     | 2.77%             | 17.71%  | 48.04%    |
| IC17        | SSP          | 2x50,<br>2x39   | 1072374044          | 96.02%  | 76.42%      | 42.08    | 12.16%            | 17.08%  | 50.02%    |
| IC18        | SSP          | 2x39            | 59976914            | 87.91%  | 68.67%      | 2.24     | 4.39%             | 18.85%  | 44.44%    |
| IC19        | SSP          | 2x39            | 51447149            | 89.38%  | 69.39%      | 2.02     | 8.24%             | 17.30%  | 46.33%    |
| IC20        | SSP          | 2x50,<br>2x39   | 640838540           | 96.30%  | 79.11%      | 23.38    | 12.43%            | 25.72%  | 39.87%    |
| IC21        | SSP          | 2x39            | 53000679            | 94.64%  | 74.57%      | 1.79     | 37.39%            | 29.89%  | 43.81%    |
| IC22        | SSP          | 2x39            | 58102606            | 94.08%  | 74.08%      | 2.51     | 6.24%             | 13.65%  | 58.41%    |
| IC23        | SSP          | 2x39            | 65859970            | 95.67%  | 75.67%      | 2.94     | 5.34%             | 11.09%  | 60.85%    |
| IC24        | SSP          | 43/42           | 66344431            | 94.63%  | 74.46%      | 2.48     | 2.00%             | 22.46%  | 46.31%    |
| IC25        | SSP          | 43/42           | 75066833            | 93.75%  | 73.66%      | 2.86     | 2.24%             | 21.30%  | 46.19%    |
| IC26        | SSP          | 43/42           | 79180860            | 92.59%  | 72.32%      | 2.97     | 2.93%             | 22.34%  | 40.42%    |
| IC27        | SSP          | 43/42           | 78037377            | 88.81%  | 67.04%      | 2.20     | 1.50%             | 31.31%  | 30.59%    |
| IC28        | SSP          | 43/42           | 61402081            | 95.24%  | 75.74%      | 2.60     | 2.46%             | 18.71%  | 46.44%    |
| IC29        | SSP          | 2x39            | 49989522            | 94.46%  | 73.36%      | 1.75     | 3.03%             | 25.82%  | 36.23%    |
| IC30        | SSP          | 2x39            | 58439504            | 93.52%  | 71.19%      | 1.75     | 17.35%            | 29.58%  | 30.47%    |
| IC32        | SSP          | 43/42           | 78233981            | 87.86%  | 66.80%      | 2.25     | 1.79%             | 30.12%  | 31.20%    |
| IC33        | SSP          | 43/42           | 62196185            | 87.26%  | 66.71%      | 1.93     | 1.93%             | 27.44%  | 36.92%    |
| IC34        | SSP          | 43/42           | 63572169            | 95.42%  | 76.74%      | 2.53     | 2.35%             | 19.64%  | 48.55%    |

| Sample name | Library type | Reads          | Fragments sequenced | Aligned | Aligned Q30 | Coverage | Est. % duplicates | 35-80bp | 120-180bp |
|-------------|--------------|----------------|---------------------|---------|-------------|----------|-------------------|---------|-----------|
| IC35        | SSP          | 43/42          | 618554393           | 86.47%  | 65.90%      | 18.22    | 5.23%             | 28.18%  | 35.24%    |
| IC36        | SSP          | 43/42          | 54402943            | 94.62%  | 74.73%      | 2.21     | 3.32%             | 17.02%  | 52.42%    |
| IC37        | SSP          | 2x50,<br>43/42 | 1175553677          | 93.00%  | 74.46%      | 38.22    | 10.15%            | 28.47%  | 35.11%    |
| IC38        | SSP          | 43/42          | 47981963            | 89.35%  | 69.45%      | 1.78     | 6.47%             | 18.59%  | 43.03%    |
| IC39        | SSP          | 43/42          | 61968854            | 95.29%  | 75.57%      | 2.62     | 2.54%             | 14.42%  | 57.28%    |
| IC40        | SSP          | 2x39           | 53228209            | 93.54%  | 71.69%      | 1.81     | 8.85%             | 24.88%  | 34.95%    |
| IC41        | SSP          | 43/42          | 78081655            | 87.11%  | 65.25%      | 2.26     | 1.61%             | 27.94%  | 35.21%    |
| IC42        | SSP          | 2x39           | 53017317            | 93.59%  | 74.33%      | 2.02     | 10.74%            | 19.04%  | 44.12%    |
| IC43        | SSP          | 43/42          | 76395478            | 88.41%  | 67.21%      | 2.40     | 1.56%             | 26.68%  | 37.76%    |
| IC44        | SSP          | 43/42          | 61354307            | 95.15%  | 74.88%      | 2.45     | 4.34%             | 19.10%  | 46.39%    |
| IC46        | SSP          | 2x39           | 60123123            | 94.51%  | 72.23%      | 2.13     | 10.37%            | 15.46%  | 50.93%    |
| IC47        | SSP          | 2x39           | 59438172            | 95.58%  | 73.84%      | 2.07     | 9.33%             | 21.67%  | 43.34%    |
| IC48        | SSP          | 43/42          | 55704417            | 91.35%  | 72.79%      | 2.01     | 13.87%            | 22.56%  | 38.68%    |
| IC49        | DSP          | 2x101          | 170489015           | 99.02%  | 90.53%      | 11.19    | 5.93%             | 2.41%   | 59.93%    |
| IC50        | DSP          | 2x101          | 203828224           | 98.72%  | 90.28%      | 10.82    | 2.83%             | 4.81%   | 66.23%    |
| IC51        | DSP          | 2x101          | 200454421           | 98.63%  | 90.53%      | 11.77    | 9.50%             | 2.58%   | 67.04%    |
| IC52        | DSP          | 2x101          | 186975845           | 98.97%  | 91.25%      | 11.37    | 2.57%             | 0.83%   | 68.96%    |

**Table S5: Sequencing statistics for additional samples included in CA01, related to Experimental Procedures.** For each sample, sequencing-related statistics, including the total number of fragments sequenced, read lengths, the percentage of such fragments aligning to the reference with and without a mapping quality threshold, mean coverage, duplication rate, and the proportion of sequenced fragments in two length bins, are tabulated. Fragment length is inferred from alignment of paired-end reads. Due to the short read lengths, coverage is calculated by assuming the entire fragment had been read. The estimated number of duplicate fragments is based on fragment endpoints, which may overestimate the true duplication rate in the presence of highly stereotyped cleavage.

SSP, single-stranded library preparation protocol. DSP, double-stranded (conventional) library preparation protocol.

Sample has been previously published (Kitzman JO et al. (2012), *Sci Transl Med* 4, 137ra76).
