# Supplementary material
Source: PubMed Central journal article supplement (PMC4715266)

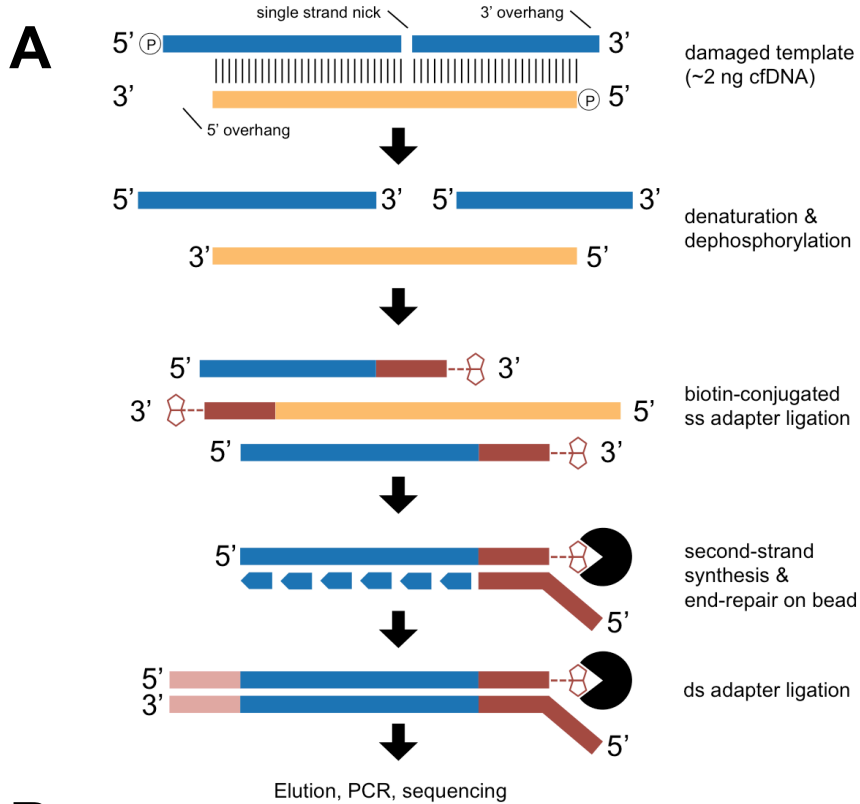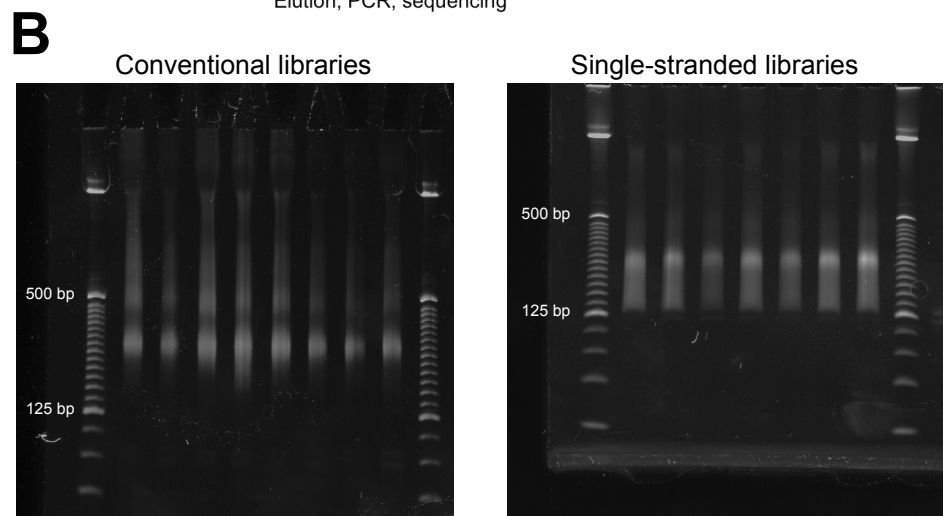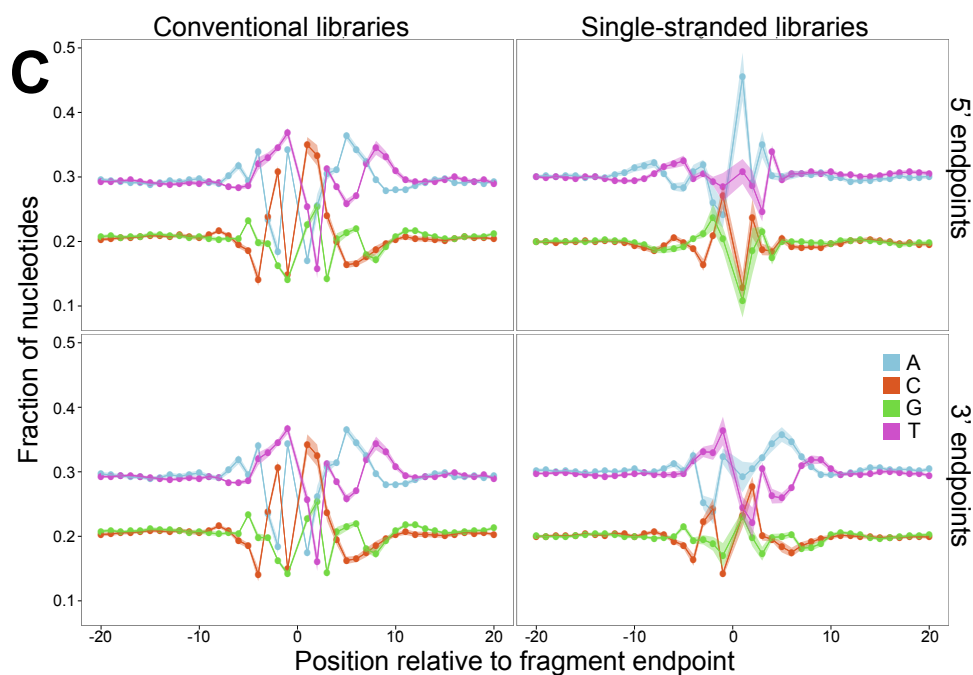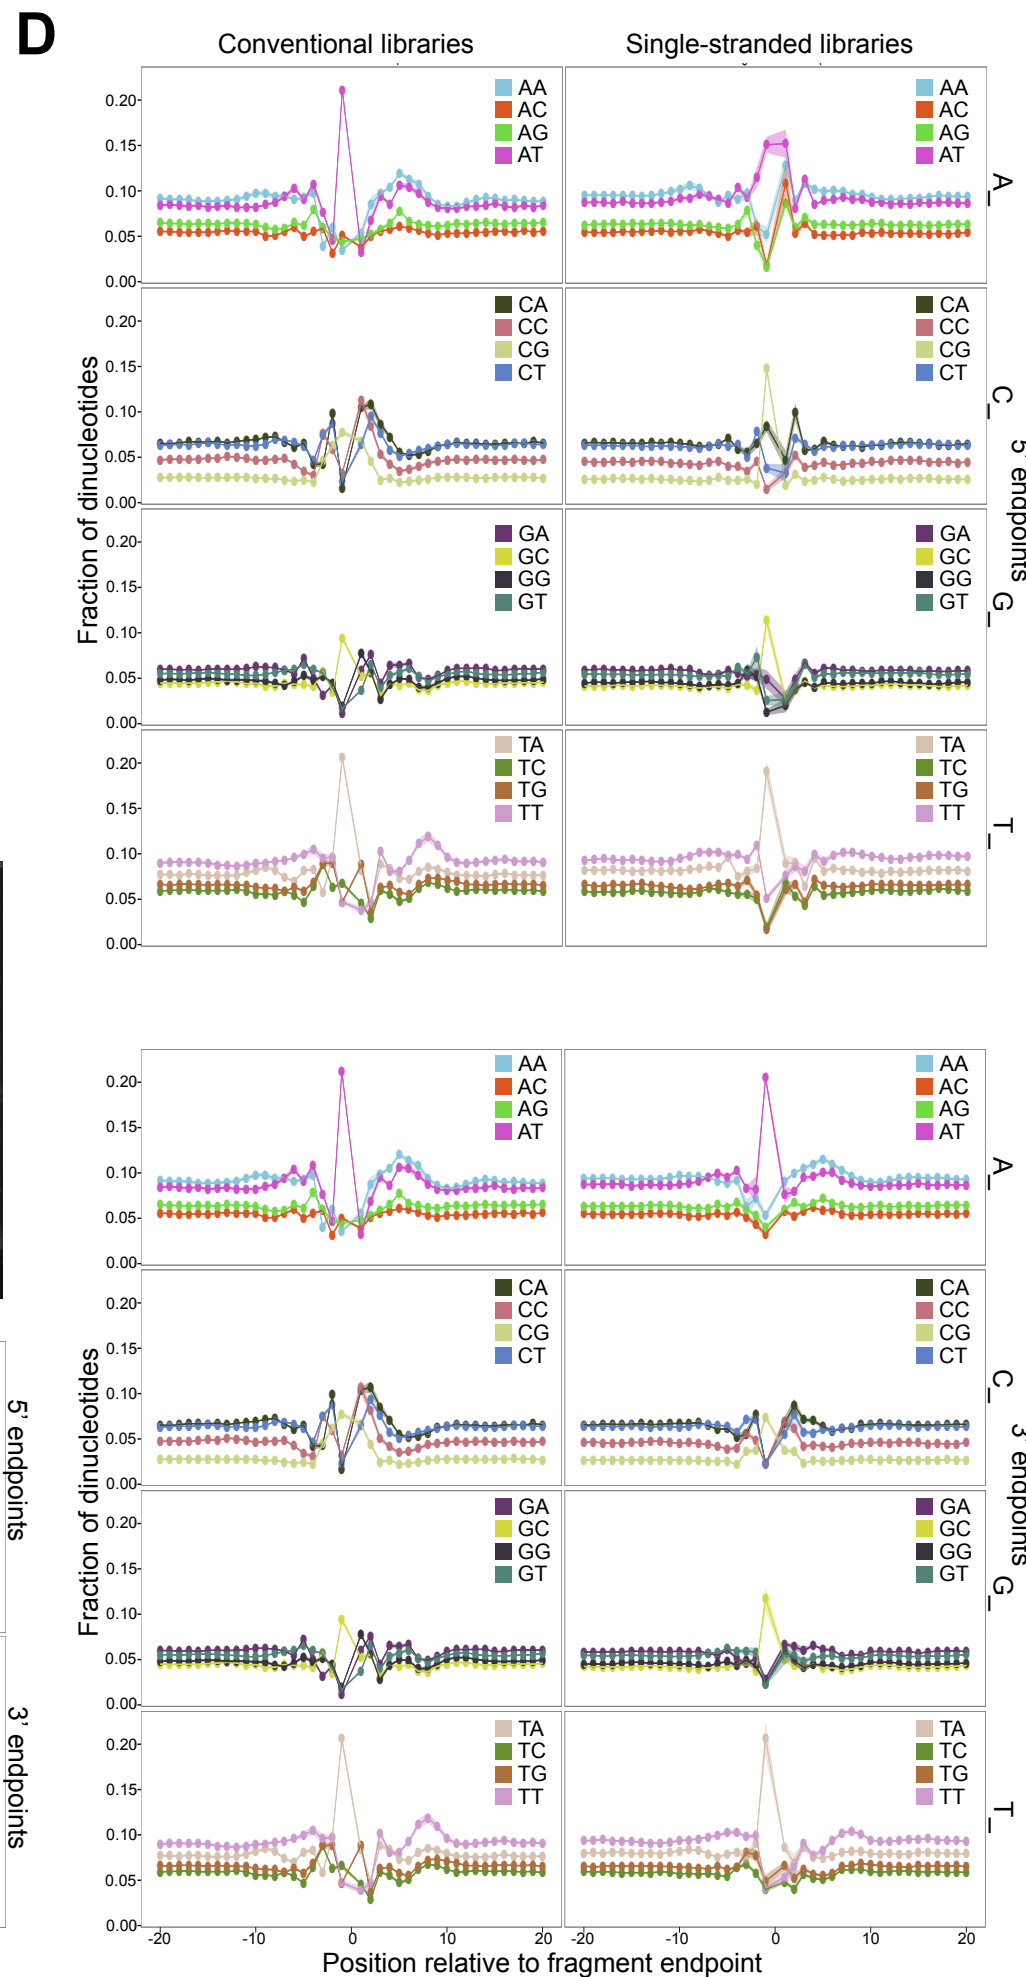

Supplement: NIHMS741058-supplement-1.pdf [file NIHMS741058-supplement-1.pdf]

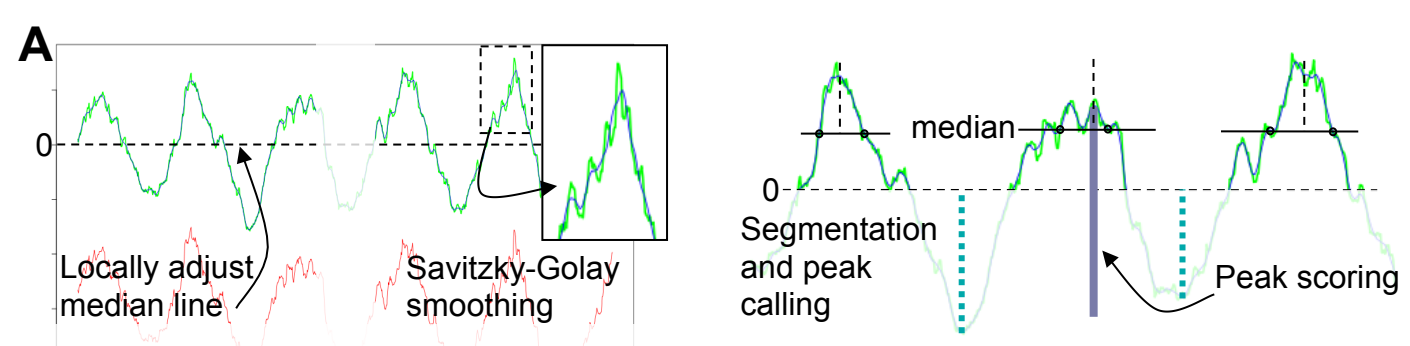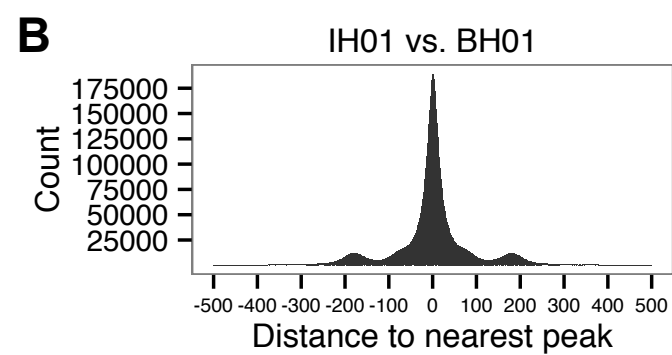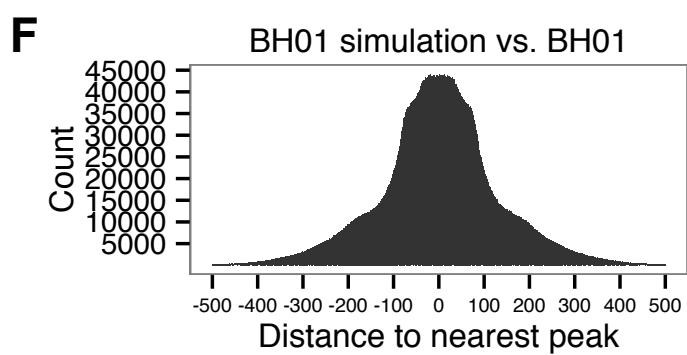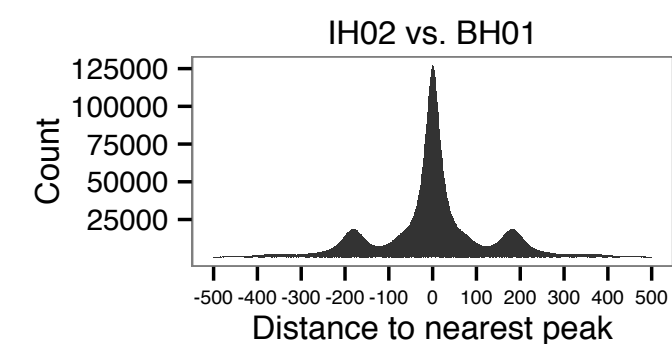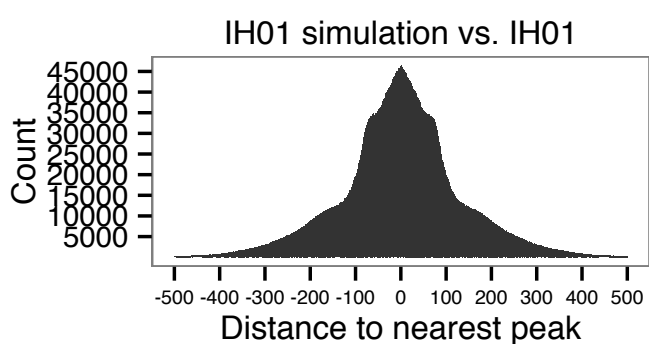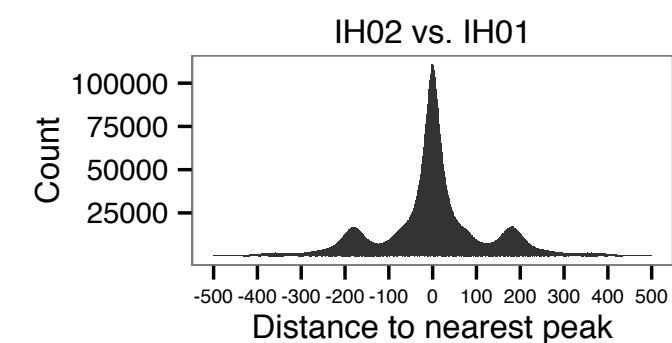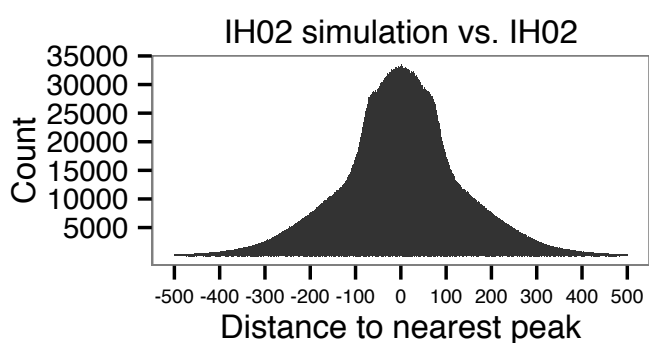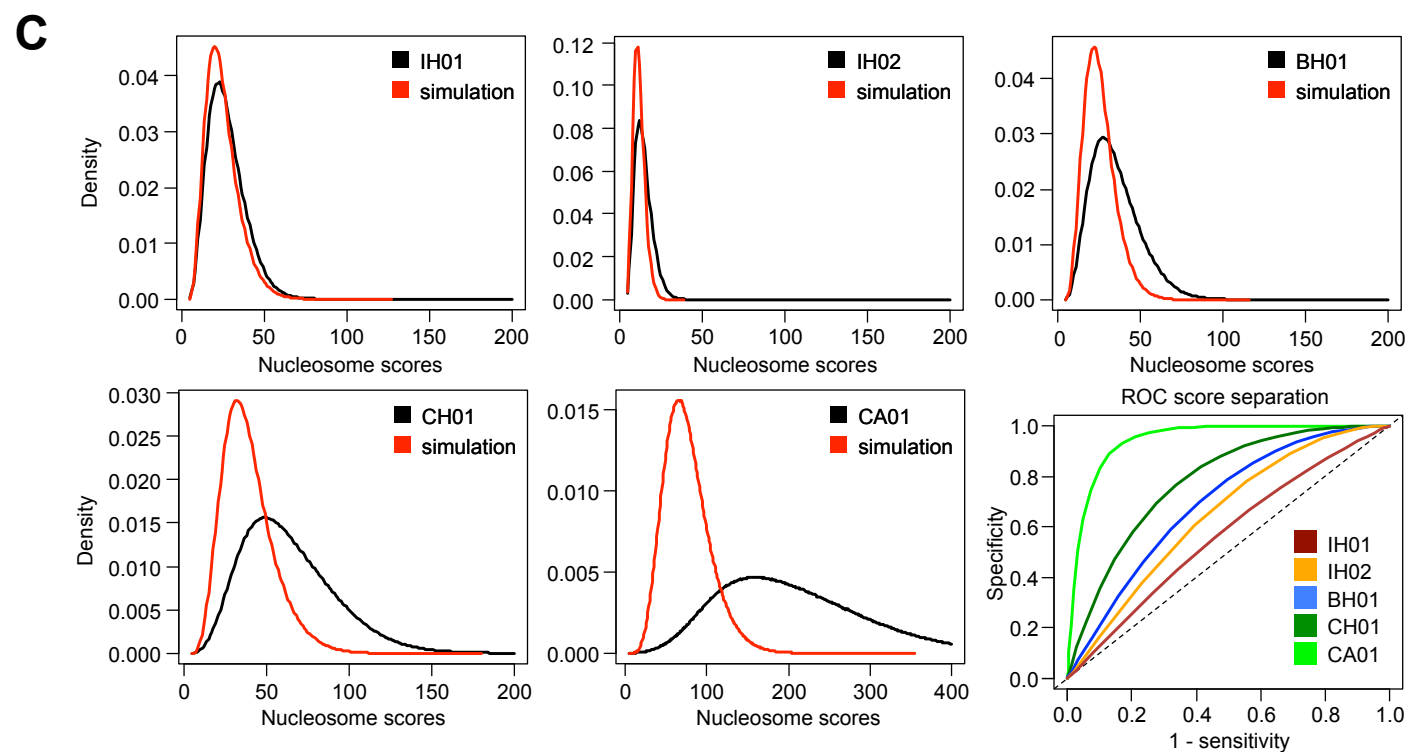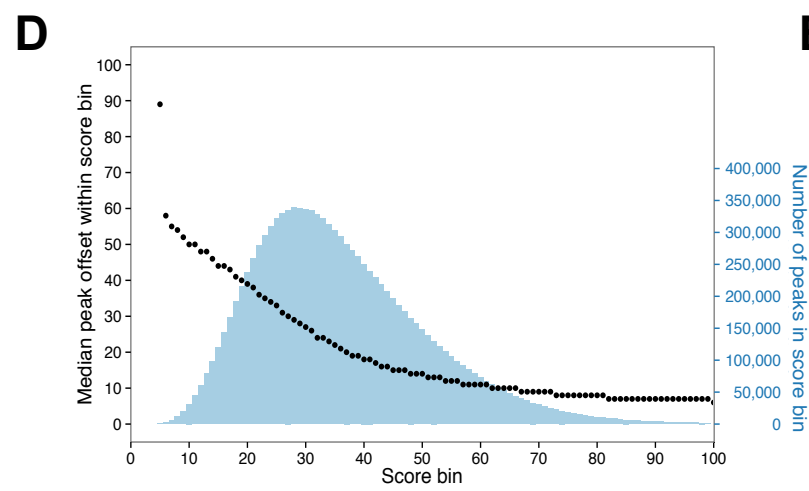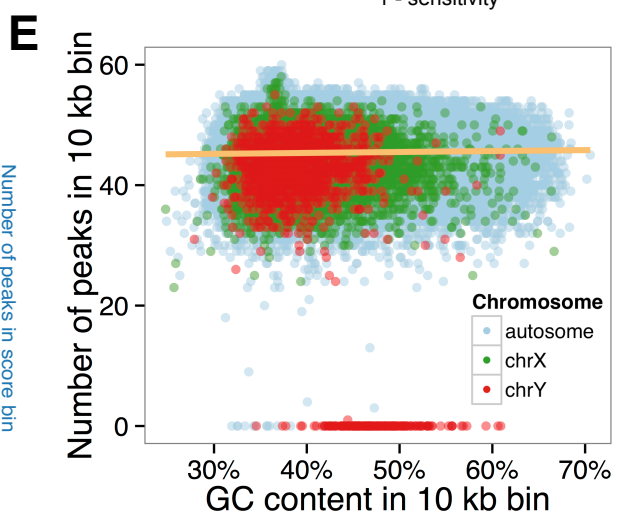

Supplement: NIHMS741058-supplement-2.pdf [file NIHMS741058-supplement-2.pdf]

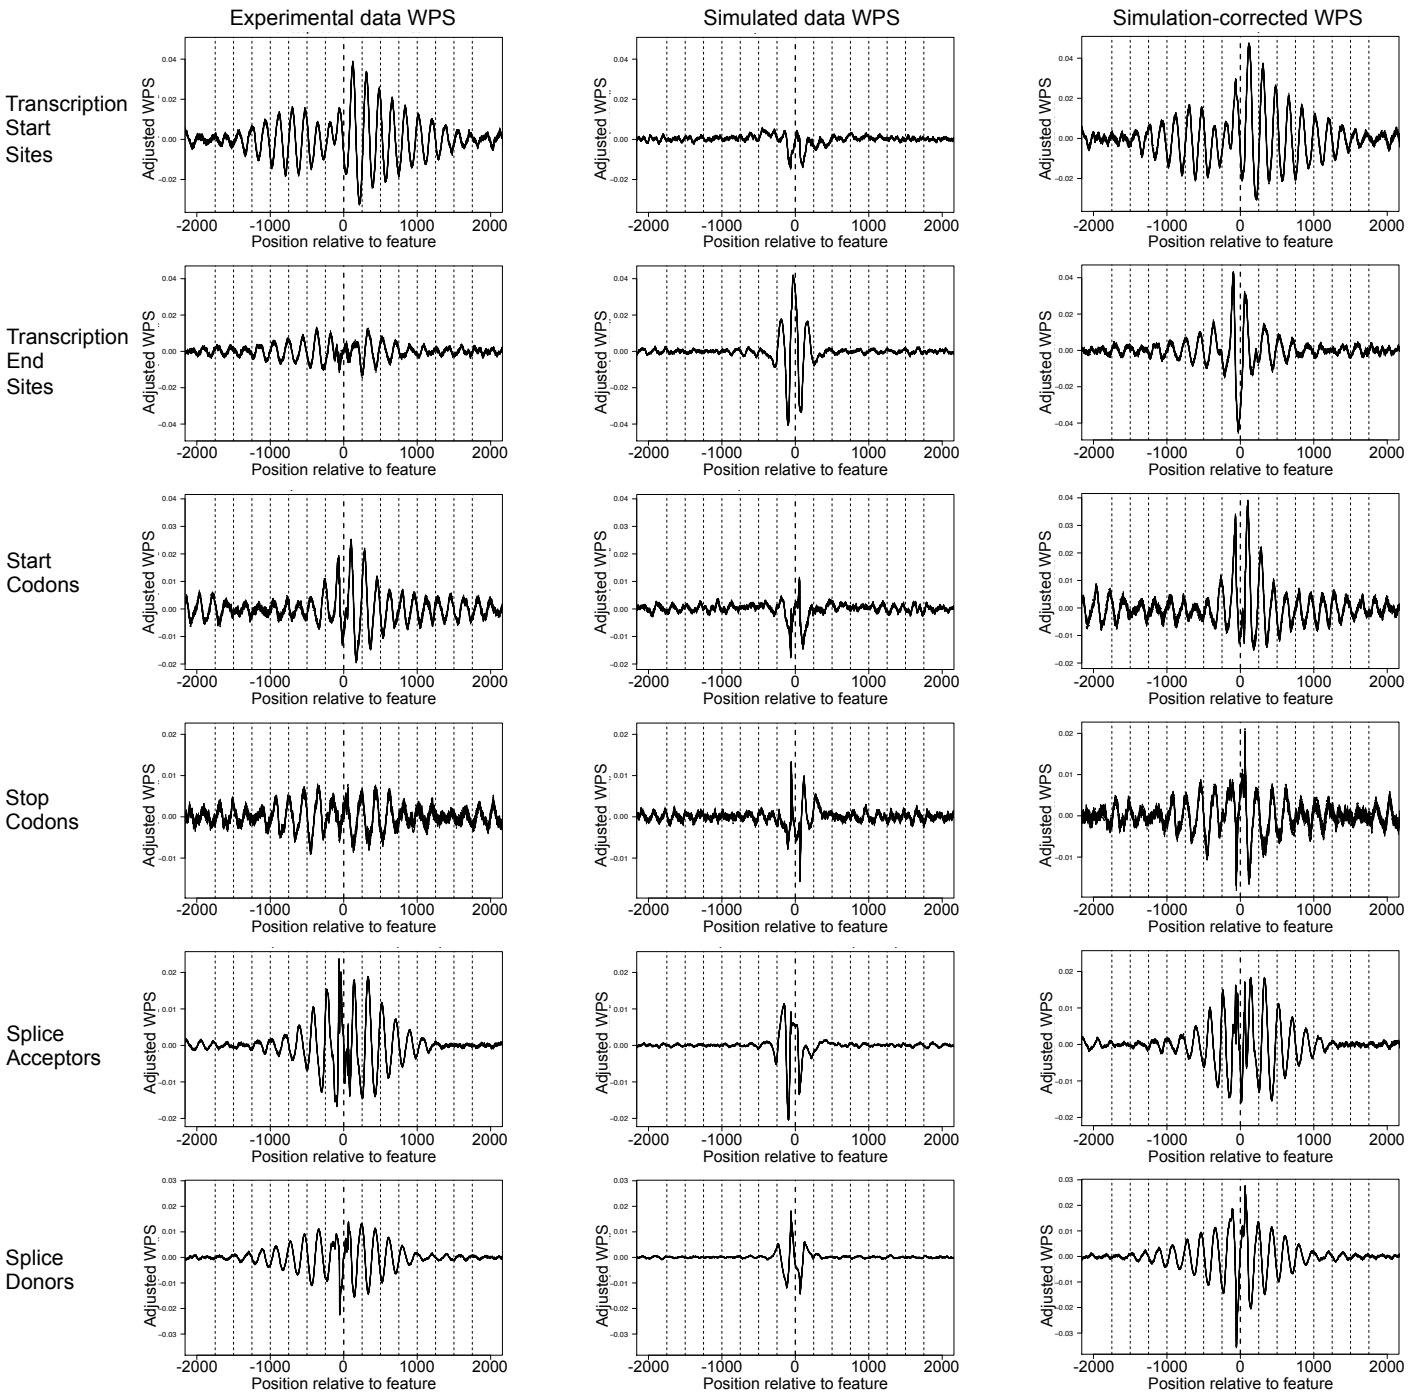

Supplement: NIHMS741058-supplement-3.pdf [file NIHMS741058-supplement-3.pdf]

**A**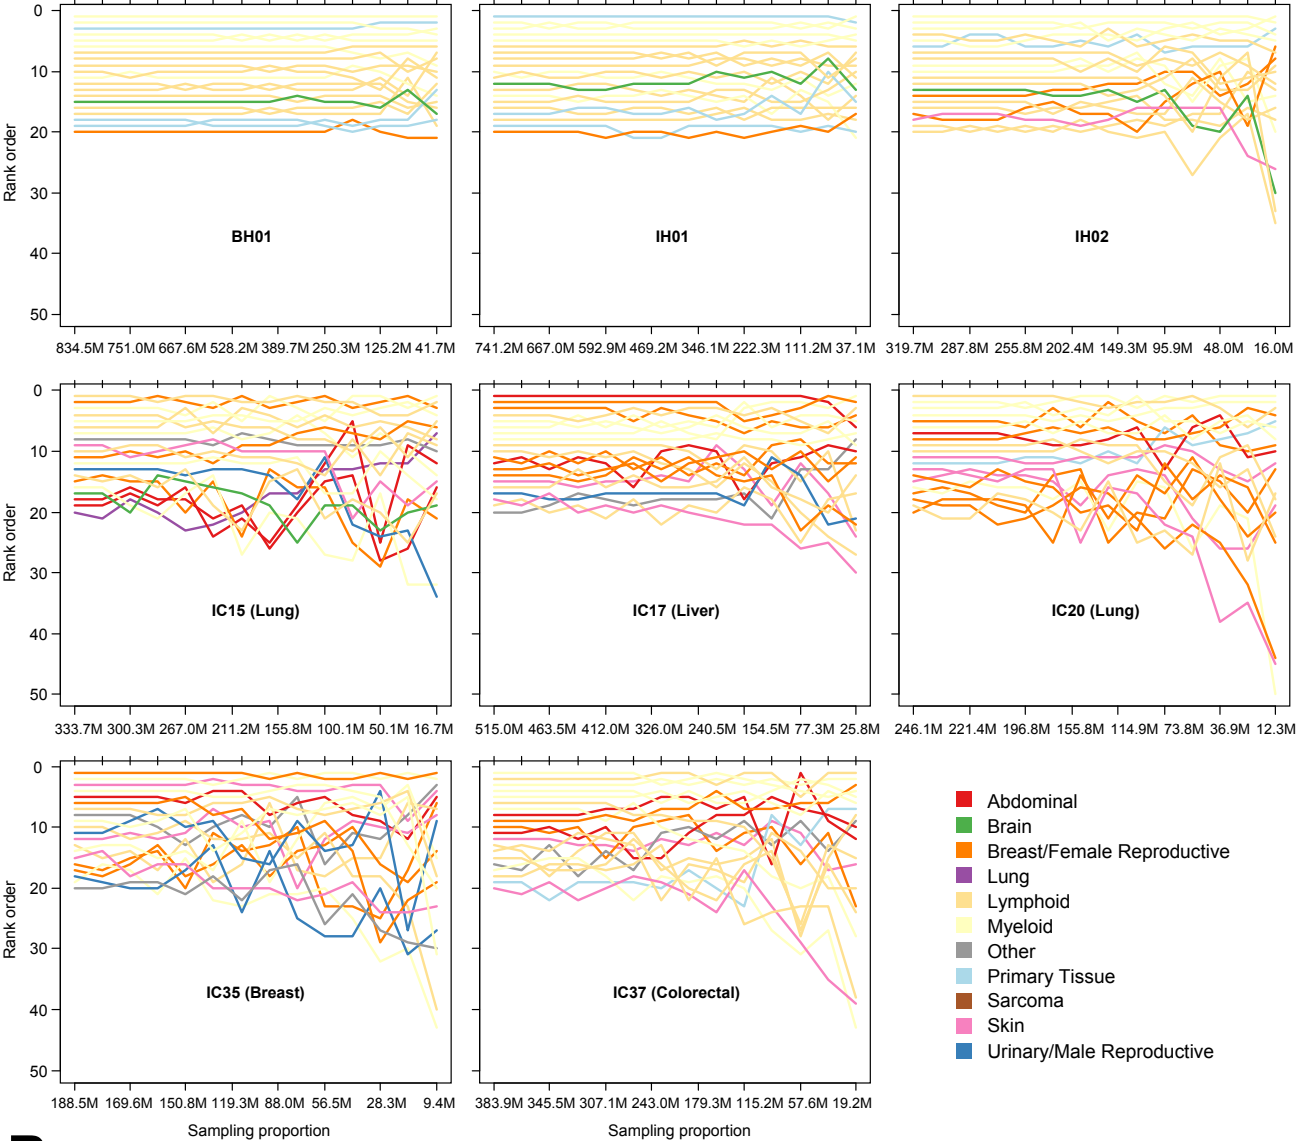**B**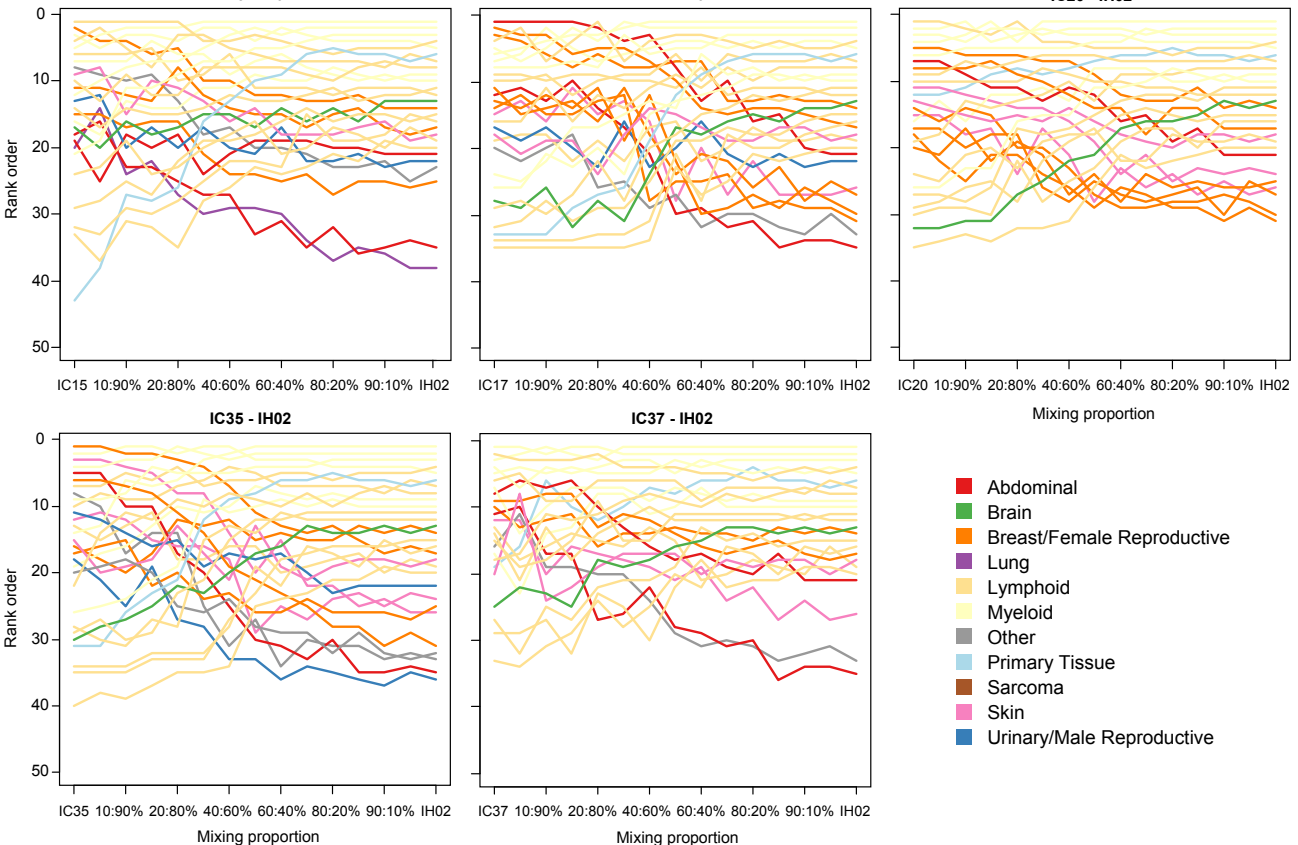

Supplement: NIHMS741058-supplement-5.pdf [file NIHMS741058-supplement-5.pdf]
